# Supplementary material for: Pigeons use distinct stop phases to control pecking
Source: Oxford University Press journal article supplement (doi:10.1242/jeb.147850), 2016-01-01
Supplement: jeb147850supp.pdf [file jeb147850supp.pdf]

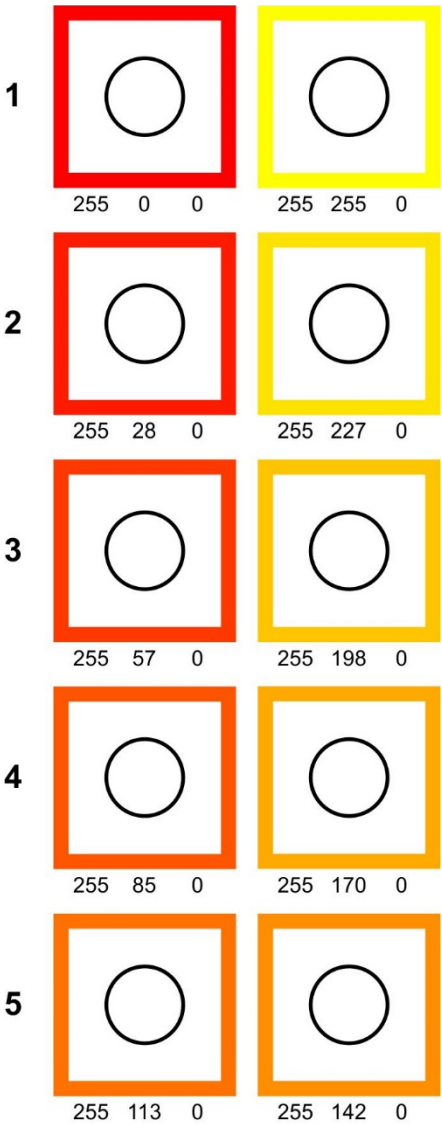

**Figure S1: Comparison of the five color pairs used in Experiment 2.** The colors become increasingly similar (from 1 to 5) and therefore the decision for the correct target (inner white circle) becomes more difficult. The corresponding RGB values are given under each frame.

**Table S1:**

Statistics of the LME that fitted best to head yaw and roll angles. We compared the change of the angles from F1 to F2 (F1→F2) and from F2 to peck (F2→Peck) for each side of the stimuli (left, center, right). The LME included stimulus size as fixed and animal as random effect: 'y ~ phase + (1 |animal)'.

|      | Side   | F1→F2 |        |        | F2→Peck |        |        |
|------|--------|-------|--------|--------|---------|--------|--------|
|      |        | Df    | t-stat | p      | Df      | t-stat | p      |
| Yaw  | left   | 3620  | 41.8   | <0.001 | 3691    | 1.5    | =0.125 |
|      | center | 3598  | 5.6    | <0.001 | 3674    | 11.5   | <0.001 |
|      | right  | 3555  | -30.1  | <0.001 | 3679    | 5.6    | <0.001 |
| Roll | left   | 3620  | -53.8  | <0.001 | 3691    | -31.1  | <0.001 |
|      | center | 3598  | -17.6  | <0.001 | 3674    | -20.7  | <0.001 |
|      | right  | 3555  | 31.9   | <0.001 | 3679    | 13.6   | <0.001 |
